# Supplementary material for: Accountability for funds for Nurturing Care: what can we measure?
Source: PubMed Central journal article supplement — Arch Dis Child. 2019 Mar 18;104(Suppl 1):S34–42. doi: 10.1136/archdischild-2018-315429 (PMC6557225; doi:10.1136/archdischild-2018-315429), 2019-03-18
Supplement: archdischild-2018-315429supp004.pdf [file archdischild-2018-315429supp004.pdf]

**Web Appendix Table 4:** Total disbursements and early child development disbursements per child under 5 by recipient (millions of constant 2015 US\$) (blank cells in disbursement per child)

| <b>Recipient</b>                       | <b>Total</b>   | <b>US\$ per child under-5</b> |
|----------------------------------------|----------------|-------------------------------|
| <b>75 Countdown priority countries</b> | <i>9,204.1</i> |                               |
| Afghanistan                            | 287.5          | 5.5                           |
| Angola                                 | 27.1           | 0.6                           |
| Azerbaijan                             | 38.4           | 4.9                           |
| Bangladesh                             | 438.6          | 2.8                           |
| Benin                                  | 49.8           | 3.1                           |
| Bolivia                                | 72.6           | 6.1                           |
| Botswana                               | 1.7            | 0.7                           |
| Brazil                                 | 11.5           | 0.1                           |
| Burkina Faso                           | 161.8          | 5.4                           |
| Burundi                                | 71.6           | 4.3                           |
| Cambodia                               | 66.1           | 3.9                           |
| Cameroon                               | 65.0           | 1.9                           |
| Central African Republic               | 58.0           | 8.0                           |
| Chad                                   | 111.8          | 4.6                           |
| China (People's Republic of)           | 43.4           | 0.1                           |
| Comoros                                | 3.5            | 3.1                           |
| Congo, Rep.                            | 6.4            | 0.9                           |
| Cote d'Ivoire                          | 39.0           | 1.1                           |
| Democratic People's Republic of Korea  | 34.3           | 2.0                           |
| Democratic Republic of the Congo       | 242.7          | 1.8                           |
| Djibouti                               | 6.8            | 6.7                           |
| Egypt                                  | 54.2           | 0.5                           |
| Equatorial Guinea                      | 0.9            | 0.7                           |
| Eritrea                                | 18.8           | 4.6                           |
| Ethiopia                               | 561.0          | 3.9                           |
| Gabon                                  | 1.0            | 0.4                           |
| Gambia                                 | 12.8           | 3.8                           |
| Ghana                                  | 295.6          | 7.8                           |
| Guatemala                              | 78.8           | 4.0                           |
| Guinea                                 | 23.8           | 1.3                           |
| Guinea-Bissau                          | 8.9            | 3.4                           |
| Haiti                                  | 180.2          | 14.5                          |
| India                                  | 412.5          | 0.3                           |
| Indonesia                              | 192.3          | 0.8                           |
| Iraq                                   | 121.3          | 2.3                           |
| Kenya                                  | 290.3          | 4.2                           |
| Kyrgyz Republic                        | 12.5           | 1.9                           |
| Lao People's Democratic Republic       | 36.3           | 4.7                           |
| Lesotho                                | 54.5           | 20.7                          |
| Liberia                                | 62.4           | 9.3                           |
| Madagascar                             | 83.8           | 2.4                           |
| Malawi                                 | 225.5          | 7.9                           |
| Mali                                   | 203.7          | 6.5                           |
| Mauritania                             | 48.5           | 8.2                           |
| Mexico                                 | 7.3            | 0.1                           |
| Morocco                                | 56.4           | 1.7                           |
| Mozambique                             | 172.4          | 3.7                           |
| Myanmar                                | 121.8          | 2.6                           |
| Nepal                                  | 208.8          | 7.1                           |
| Niger                                  | 212.9          | 5.9                           |

|                                       |                |      |
|---------------------------------------|----------------|------|
| Nigeria                               | 433.2          | 1.5  |
| Pakistan                              | 315.3          | 1.3  |
| Papua New Guinea                      | 11.4           | 1.1  |
| Peru                                  | 140.3          | 4.7  |
| Philippines                           | 76.9           | 0.7  |
| Rwanda                                | 105.1          | 6.2  |
| Sao Tome and Principe                 | 3.4            | 11.1 |
| Senegal                               | 109.4          | 4.6  |
| Sierra Leone                          | 161.3          | 14.4 |
| Solomon Islands                       | 5.0            | 6.7  |
| Somalia                               | 173.6          | 7.0  |
| South Africa                          | 41.2           | 0.7  |
| South Sudan                           | 123.5          | 11.0 |
| Sudan                                 | 145.0          | 2.6  |
| Swaziland                             | 6.8            | 3.9  |
| Tajikistan                            | 19.2           | 1.8  |
| Tanzania                              | 247.5          | 2.8  |
| Togo                                  | 25.3           | 2.3  |
| Turkmenistan                          | 0.6            | 0.1  |
| Uganda                                | 246.7          | 3.6  |
| Uzbekistan                            | 26.0           | 0.8  |
| Vietnam                               | 283.9          | 3.8  |
| Yemen                                 | 327.1          | 8.3  |
| Zambia                                | 262.0          | 9.8  |
| Zimbabwe                              | 317.8          | 13.4 |
| <b>74 non-priority countries</b>      | <b>1,556.2</b> |      |
| Albania                               | 19.8           | 11.2 |
| Algeria                               | 10.1           | 0.2  |
| Argentina                             | 2.2            | 0.1  |
| Armenia                               | 22.4           | 11.0 |
| Barbados                              | 0.0            | 0.5  |
| Belarus                               | 1.8            | 0.3  |
| Belize                                | 2.4            | 6.1  |
| Bhutan                                | 1.5            | 2.0  |
| Bosnia and Herzegovina                | 32.6           | 19.0 |
| Cabo Verde                            | 3.3            | 5.9  |
| Chile                                 | 1.9            | 0.2  |
| Colombia                              | 83.9           | 2.2  |
| Cook Islands                          | 0.7            |      |
| Costa Rica                            | 3.4            | 1.0  |
| Croatia                               | 0.0            | 0.1  |
| Cuba                                  | 4.6            | 0.7  |
| Dominica                              | 2.0            |      |
| Dominican Republic                    | 7.1            | 0.7  |
| Ecuador                               | 23.8           | 1.5  |
| El Salvador                           | 17.5           | 2.9  |
| Fiji                                  | 4.6            | 5.1  |
| Former Yugoslav Republic of Macedonia | 1.7            | 1.4  |
| Georgia                               | 42.4           | 16.5 |
| Grenada                               | 1.5            | 32.0 |
| Guyana                                | 6.2            | 8.3  |
| Honduras                              | 46.8           | 4.7  |
| Iran                                  | 6.4            | 0.1  |
| Jamaica                               | 18.2           | 8.7  |
| Jordan                                | 319.9          | 26.8 |

|                                   |                |      |
|-----------------------------------|----------------|------|
| Kazakhstan                        | 4.4            | 0.2  |
| Kiribati                          | 2.4            | 23.6 |
| Kosovo                            | 15.6           |      |
| Lebanon                           | 160.3          | 36.3 |
| Libya                             | 10.3           | 2.7  |
| Malaysia                          | 0.8            | 0.0  |
| Maldives                          | 0.5            | 1.3  |
| Marshall Islands                  | 0.5            |      |
| Mauritius                         | 1.0            | 1.5  |
| Mayotte                           | 0.2            |      |
| Micronesia, Fed. States           | 0.7            | 9.6  |
| Moldova                           | 9.6            | 5.0  |
| Mongolia                          | 20.3           | 6.3  |
| Montenegro                        | 1.1            | 3.3  |
| Montserrat                        | 0.7            |      |
| Namibia                           | 12.7           | 4.0  |
| Nauru                             | 2.3            |      |
| Nicaragua                         | 70.7           | 11.4 |
| Niue                              | 0.0            |      |
| Oman                              | 0.1            | 0.2  |
| Palau                             | 1.0            |      |
| Panama                            | 2.2            | 0.6  |
| Paraguay                          | 3.3            | 0.5  |
| Saint Helena                      | 1.4            |      |
| Saint Lucia                       | 7.8            | 70.8 |
| Saint Vincent and the Grenadines  | 0.3            | 38.2 |
| Samoa                             | 0.6            | 3.2  |
| Serbia                            | 16.1           | 4.1  |
| Seychelles                        | 0.1            | 2.9  |
| Sri Lanka                         | 72.1           | 4.2  |
| Suriname                          | 0.5            | 2.7  |
| Syrian Arab Republic              | 127.4          | 5.7  |
| Thailand                          | 76.6           | 1.9  |
| Timor-Leste                       | 43.7           | 22.1 |
| Tokelau                           | 0.0            |      |
| Tonga                             | 3.2            | 24.3 |
| Tunisia                           | 16.6           | 1.8  |
| Turkey                            | 36.2           | 0.5  |
| Tuvalu                            | 2.3            |      |
| Ukraine                           | 38.4           | 1.6  |
| Uruguay                           | 0.8            | 0.3  |
| Vanuatu                           | 17.6           | 50.8 |
| Venezuela                         | 1.5            | 0.1  |
| Wallis and Futuna                 | 0.1            |      |
| West Bank and Gaza Strip          | 83.4           | 13.2 |
| <b>Regional disbursements</b>     | <b>3,729.4</b> |      |
| Africa, regional                  | 169.6          |      |
| America, regional                 | 96.2           |      |
| Asia, regional                    | 179.4          |      |
| Central Asia, regional            | 5.9            |      |
| Europe, regional                  | 17.8           |      |
| Far East Asia, regional           | 19.6           |      |
| Middle East, regional             | 43.1           |      |
| North & Central America, regional | 12.4           |      |
| North of Sahara, regional         | 56.6           |      |

|                                  |                |  |
|----------------------------------|----------------|--|
| Oceania, regional                | 6.8            |  |
| South & Central Asia, regional   | 8.3            |  |
| South America, regional          | 3.2            |  |
| South Asia, regional             | 14.8           |  |
| South of Sahara, regional        | 489.2          |  |
| States Ex-Yugoslavia             | 0.9            |  |
| West Indies, regional            | 6.2            |  |
| <b>Unspecified disbursements</b> | <i>1,299.6</i> |  |
| Bilateral, unspecified           | 1,299.6        |  |
| <b>Total</b>                     | <i>13,190</i>  |  |
